# Supplementary material
Source: PubMed Central journal article supplement (PMC3468155)

A

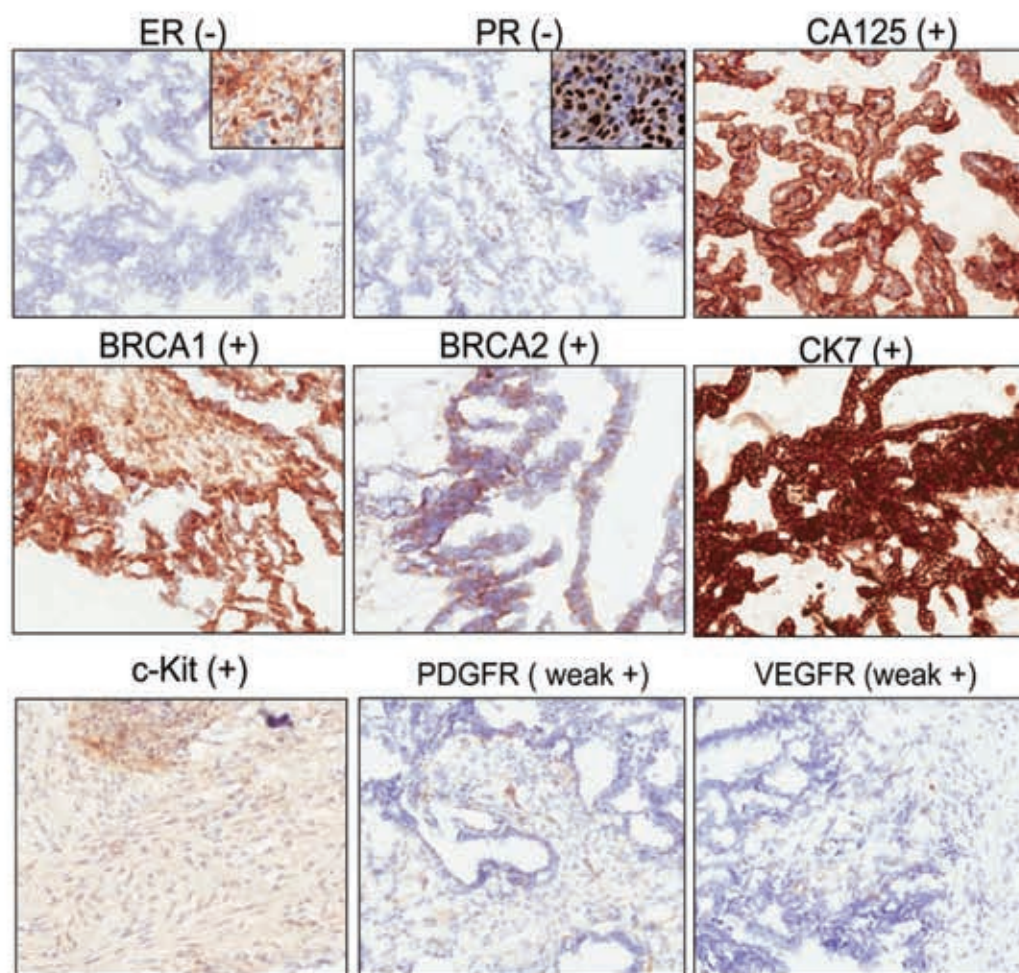

B

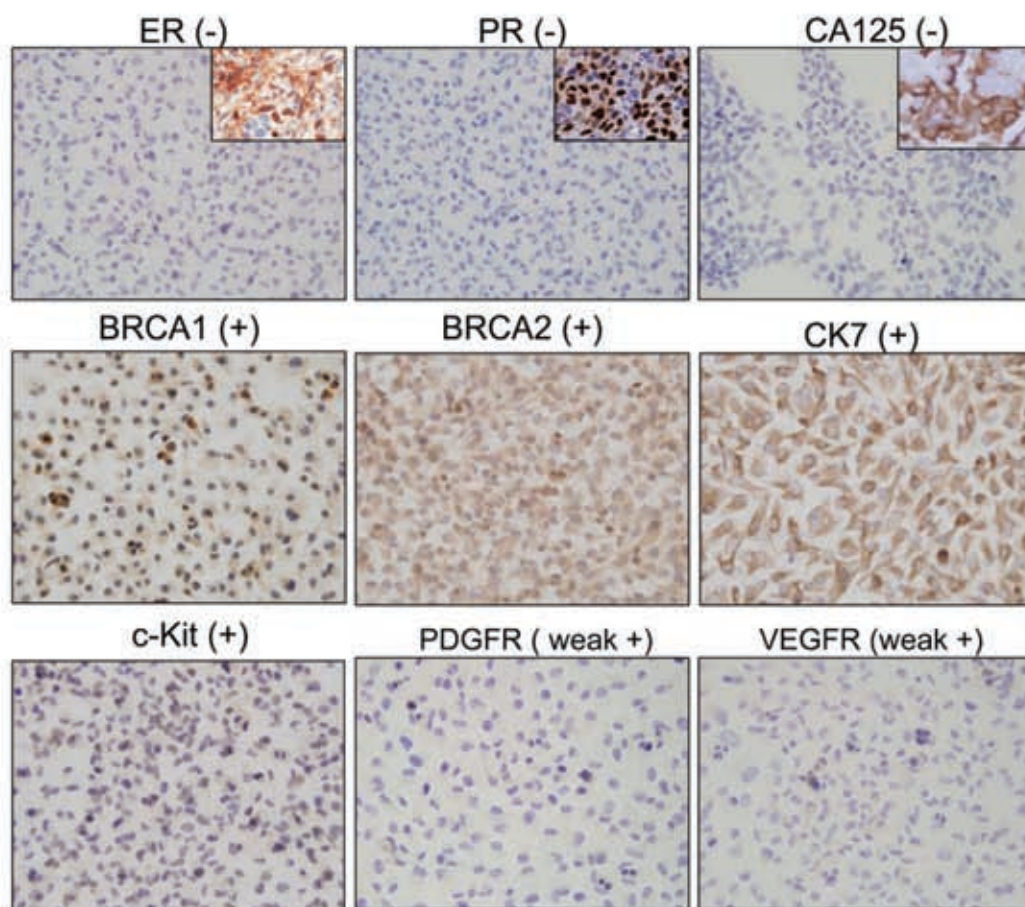

Supplement: NIHMS407659-supplement-01.pdf [file NIHMS407659-supplement-01.pdf]

A

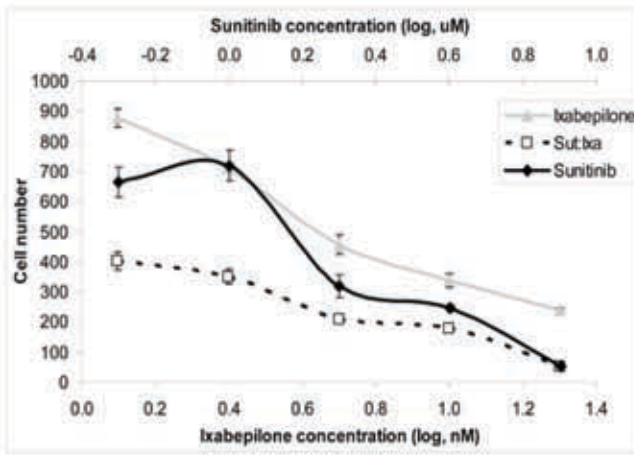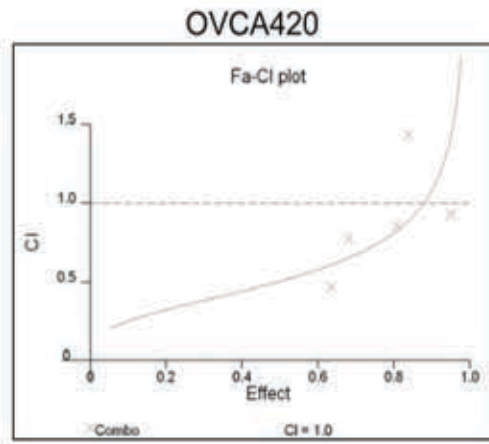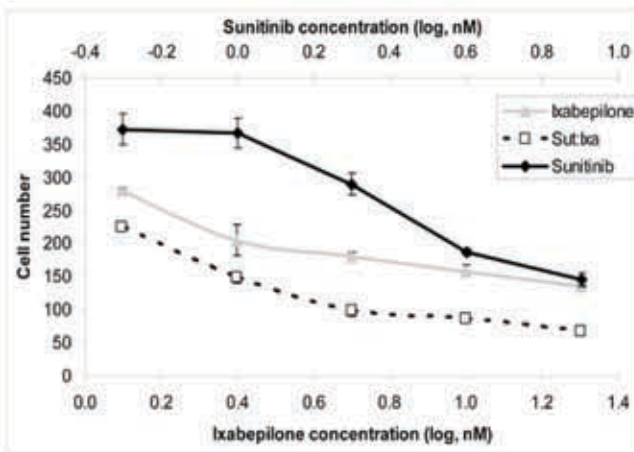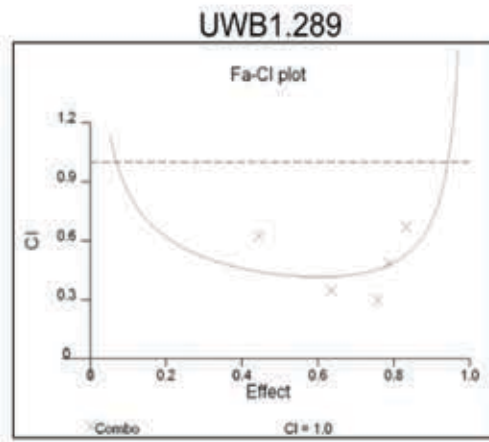

B

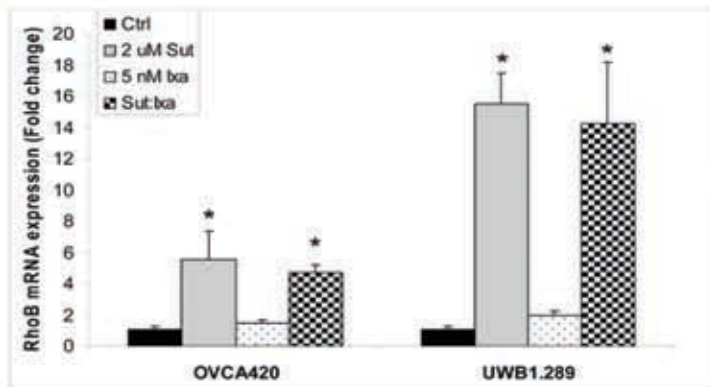

D

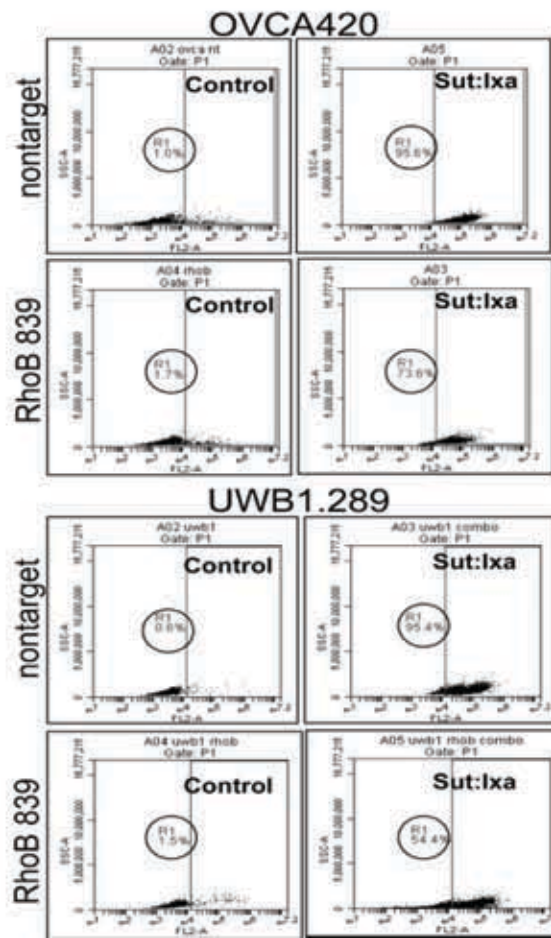

C

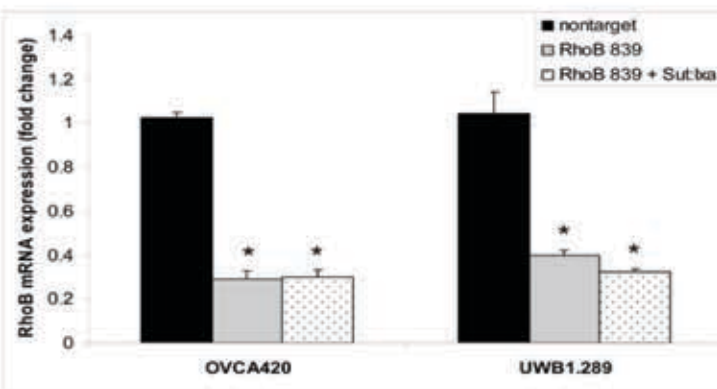

Supplement: NIHMS407659-supplement-02.pdf [file NIHMS407659-supplement-02.pdf]
